# Supplementary material for: Challenges in Quantifying 8-OHdG and 8-Isoprostane in Exhaled Breath Condensate
Source: MDPI journal article supplement (doi:10.3390/antiox11050830), 2022-04-25
Supplement: s1 [file s1]

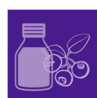

## Supplementary Information

## Challenges in quantifying 8-OHdG and 8-Isoprostane in exhaled breath condensate

Maud Hemmendinger<sup>1\*</sup>, Jean-Jacques Sauvain<sup>1</sup>, Nancy B. Hopf<sup>1</sup>, Guillaume Suárez<sup>1</sup> and Irina Guseva Canu<sup>1</sup>

<sup>1</sup> Department of Occupational and Environmental Health, Center for Primary Care and Public Health (Unisanté), 1006, Epalinges-Lausanne, Switzerland; jean-jacques.sauvain@unisante.ch (J.J.S.); nancy.hopf@unisante.ch (N.H.); guillaume.suarez@unisante.ch (G.S.); irina.guseva-canu@unisante.ch (I.G.C.)

\* Correspondence: maud.hemmendinger@unisante.ch; Tel.: (+41 21 314 74 59);

Table S1. Description of the standard preparation with the corresponding concentrations

| Label                       | volume of working solution at 500 pg/ml [ $\mu$ L] | Volume of H <sub>2</sub> O [ $\mu$ L] | Volume of working solution of IS 2,5ng/ml [ $\mu$ L] | Volume of BHT [ $\mu$ L] | Total volume [ $\mu$ L] | Final concentration Std [pg/ml]                                      | Final concentration IS [ng/ml] | BHT (mg/ml) |
|-----------------------------|----------------------------------------------------|---------------------------------------|------------------------------------------------------|--------------------------|-------------------------|----------------------------------------------------------------------|--------------------------------|-------------|
| Std 0                       | 0                                                  | 800                                   | 200                                                  | 10                       | 1010                    | 0                                                                    | 0,495                          | 0,099       |
| Std 15                      | 30                                                 | 770                                   | 200                                                  | 10                       | 1010                    | 15                                                                   | 0,495                          | 0,099       |
| Std 50                      | 100                                                | 700                                   | 200                                                  | 10                       | 1010                    | 50                                                                   | 0,495                          | 0,099       |
| Std 100                     | 200                                                | 600                                   | 200                                                  | 10                       | 1010                    | 99                                                                   | 0,495                          | 0,099       |
| Std 300                     | 600                                                | 200                                   | 200                                                  | 10                       | 1010                    | 297                                                                  | 0.495                          | 0.099       |
| <b>Before concentration</b> |                                                    |                                       |                                                      |                          |                         |                                                                      |                                |             |
| H20 0                       | 0                                                  | 985                                   | 15                                                   | 10                       | 1010                    | 0                                                                    | 0,037                          | 0,099       |
| H20 5                       | 10                                                 | 975                                   | 15                                                   | 10                       | 1010                    | 5                                                                    | 0,037                          | 0,099       |
| H20 15                      | 30                                                 | 955                                   | 15                                                   | 10                       | 1010                    | 15                                                                   | 0,037                          | 0,099       |
| H20 25                      | 50                                                 | 935                                   | 15                                                   | 10                       | 1010                    | 25                                                                   | 0,037                          | 0,099       |
| H20 50                      | 100                                                | 885                                   | 15                                                   | 10                       | 1010                    | 50                                                                   | 0,037                          | 0,099       |
|                             |                                                    |                                       |                                                      |                          |                         | <b>After concentration and reconstitution in 75<math>\mu</math>L</b> |                                |             |
|                             |                                                    |                                       |                                                      |                          |                         | 0                                                                    | 0,495                          | 1,320       |
|                             |                                                    |                                       |                                                      |                          |                         | 67                                                                   | 0,495                          | 1,320       |
|                             |                                                    |                                       |                                                      |                          |                         | 200                                                                  | 0,495                          | 1,320       |
|                             |                                                    |                                       |                                                      |                          |                         | 333                                                                  | 0,495                          | 1,320       |
|                             |                                                    |                                       |                                                      |                          |                         | 666                                                                  | 0.495                          | 1.320       |

Std = not evaporated standards; H20 = standards that will be evaporated.

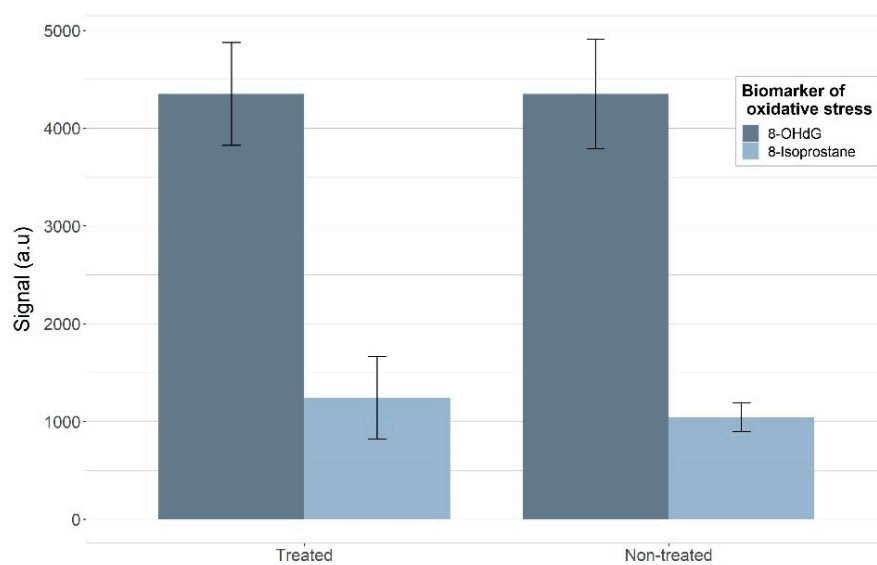

**Figure S1.** Effect of Tween-20 treatment on material surface on the signal (not corrected with IS) of 8-OHdG and 8- isoprostane. Error bars correspond to a minimum of nine independent repetitions.



Table S2. Main figure of merit of the analytical method for 8-OHdG in EBC

| Method characteristics - 8-OHdG      | Expected performances           | Observed values | Conclusion   |
|--------------------------------------|---------------------------------|-----------------|--------------|
| <i>Calibration</i>                   |                                 |                 |              |
| Function                             |                                 |                 | linear       |
| Concentration range [pg/ml]          | 0-1333                          |                 |              |
| Bias for std. 67 pg/ml               | >15%                            | 6,9%            | Verified     |
| Bias for std. 200 pg/ml              | 10%                             | 4,9%            | Verified     |
| Bias for std. 333 pg/ml              | 10%                             | 1,3%            | Verified     |
| Bias for std. 666 pg/ml              | 10%                             | 1,0%            | Verified     |
| Bias for std. 1333 pg/ml             | 10%                             | 0,4%            | Verified     |
| <i>LOQ (a-priori estimate)</i>       | 22 pg/ml (ech conc speedvac)    |                 |              |
| Maximum accepted range               | $\pm 13.2$ pg/ml = 60%*22 pg/ml |                 |              |
| Upper accepted value [pg/ml]         | 35,2                            | 27,1            | Verified     |
| Lower accepted value [pg/ml]         | 8,8                             | 23,5            | Verified     |
| LOD (1/3 LOQ) [pg/ml]                |                                 | 7,30            | Verified     |
| LOD in EBC [pg/ml]                   |                                 | 0,5             | Verified     |
| <i>Recovery</i>                      |                                 |                 |              |
| Value EBC non spiked [pg/ml]         | 0,00                            |                 |              |
| EBC spiked 1 [pg/ml]                 | 5,00                            | 4,8             |              |
| EBC spiked 2 [pg/ml]                 | 15,00                           | 14,0            |              |
| Recovery spike 1 [%]                 | [90 - 110]                      | 98 $\pm$ 10     | Verified     |
| Recovery spike 2 [%]                 | [90 - 110]                      | 89 $\pm$ 8      | Verified     |
| <i>Repeatability (CV)</i>            |                                 |                 |              |
| EBC non spiked                       | < LOD                           | n.d.            |              |
| EBC spiked 1 (5 pg/ml)               | 20%                             | 19,8            | Verified     |
| EBC spiked 2 (15 pg/ml)              | 10%                             | 1,0             | Verified     |
| <i>Accuracy</i>                      |                                 |                 |              |
| Reference value EBC spiked 1 [pg/ml] | 5,00                            |                 |              |
| $u_{ref}$                            | 2,0                             |                 |              |
| Maximum accepted difference          | 25%                             |                 |              |
| Normalized range                     | 2                               | 0,14            | Verified     |
| Maximum accepted range [pg/ml]       | 6,25                            | 6,02            | Verified     |
| Minimum accepted range [pg/ml]       | 3,75                            | 4,53            | Verified     |
| Reference value EBC spiked 2 [pg/ml] | 15,00                           |                 |              |
| $u_{ref}$                            | 2,0                             |                 |              |
| Maximum accepted difference          | 10%                             |                 |              |
| Normalized range                     | 2                               | -0,52           | Verified     |
| Maximum accepted range [pg/ml]       | 16,50                           | 14,82           | Verified     |
| Minimum accepted range [pg/ml]       | 13,50                           | 13,10           | Not verified |

**Table S3.** Main figure of merit of the analytical method for 8-isoprostane in EBC

| Method characteristics - 8-isoprostane | Expected performances         | Observed values | Conclusion |
|----------------------------------------|-------------------------------|-----------------|------------|
| <i>Calibration</i>                     |                               |                 |            |
| Function                               |                               |                 | linear     |
| Concentration range [pg/ml]            | 0-1333                        |                 |            |
| Bias for std. 67 pg/ml                 | >15%                          | 10,0%           | Verified   |
| Bias for std. 200 pg/ml                | 10%                           | -5,9%           | Verified   |
| Bias for std. 333 pg/ml                | 10%                           | 4,5%            | Verified   |
| Bias for std. 666 pg/ml                | 10%                           | -2,6%           | Verified   |
| Bias for std. 1333 pg/ml               | 10%                           | 1,0%            | Verified   |
| <i>LOQ (a-priori estimate)</i>         | 40 pg/ml (ech conc speedvac)  |                 |            |
| Maximum accepted range                 | $\pm 24$ pg/ml = 60%*40 pg/ml |                 |            |
| Upper accepted value [pg/ml]           | 63,5                          | 27,9            | Verified   |
| Lower accepted value [pg/ml]           | 15,9                          | 18,3            | Verified   |
| LOD (1/3 LOQ) [pg/ml]                  |                               | 13,2            | Verified   |
| LOD in EBC [pg/ml]                     |                               | 1,0             | Verified   |
| <i>Recovery</i>                        |                               |                 |            |
| Value EBC non spiked [pg/ml]           | 0,00                          |                 |            |
| EBC spiked 1 [pg/ml]                   | 5,00                          | 5,4             |            |
| EBC spiked 2 [pg/ml]                   | 15,00                         | 15,1            |            |
| Recovery spike 1 [%]                   | [90 - 110]                    | 104 $\pm$ 7     | Verified   |
| Recovery spike 2 [%]                   | [90 - 110]                    | 95 $\pm$ 6      | Verified   |
| <i>Repeatability (CV)</i>              |                               |                 |            |
| EBC non spiked                         | < LOD                         | n.d.            |            |
| EBC spiked 1 (5 pg/ml)                 | 20%                           | 11,1            | Verified   |
| EBC spiked 2 (15 pg/ml)                | 10%                           | 5,9             | Verified   |
| <i>Accuracy</i>                        |                               |                 |            |
| Reference value EBC spiked 1 [pg/ml]   | 5,00                          |                 |            |
| $U_{ref}$                              | 2,0                           |                 |            |
| Maximum accepted difference            | 50%                           |                 |            |
| Normalized range                       | 2                             | 0,38            | Verified   |
| Maximum accepted range [pg/ml]         | 7,50                          | 7,34            | Verified   |
| Minimum accepted range [pg/ml]         | 2,50                          | 4,23            | Verified   |
| Reference value EBC spiked 2 [pg/ml]   | 15,00                         |                 |            |
| $U_{ref}$                              | 2,0                           |                 |            |
| Maximum accepted difference            | 15%                           |                 |            |
| Normalized range                       | 2                             | 0,04            | Verified   |
| Maximum accepted range [pg/ml]         | 17,25                         | 16,87           | Verified   |
| Minimum accepted range [pg/ml]         | 12,75                         | 13,29           | Verified   |

**Table S4.** Results obtained for the calibration, QC and EBC samples

|                | Calibration Curve |           |                |             | QC 5 (pg/ml) |                  | Average EBC Concentration |
|----------------|-------------------|-----------|----------------|-------------|--------------|------------------|---------------------------|
| 8-OHdG         | Slope             | Intercept | R <sup>2</sup> | LOD (pg/ml) | Theoretical  | Experimental     |                           |
| Healthy (n=10) | 0.032             | -0.0019   | 0.999          | 0.5         | 5            | 4.86 ±0.11 (n=4) | <LOD                      |
| Asthma (n=7)   |                   |           |                |             |              |                  | <LOD                      |
| COPD (n=9)     |                   |           |                |             |              |                  | <LOD                      |
| 8-isoprostane  |                   |           |                |             |              |                  |                           |
| Healthy (n=10) | 0.065             | 0.034     | 0.996          | 1.0         | 5            | 5.06±1.06 (n=4)  | <LOD                      |
| Asthma (n=7)   |                   |           |                |             |              |                  | <LOD                      |
| COPD (n=9)     |                   |           |                |             |              |                  | <LOD                      |

n = the number of measures.
